# Supplementary material
Source: publisher figshare collection journal article supplement (https://acs.figshare.com/ndownloader/files/4596361)
Supplement: Supplementary file 1 [file 4596361]

  
data_cd22225 
  
_audit_creation_method            SHELXL-97 
_chemical_name_systematic 
; 
 ? 
; 
_chemical_name_common             ? 
_chemical_melting_point           ? 
_chemical_formula_moiety          ? 
_chemical_formula_sum 
 'C14 H17 N O2 S3' 
_chemical_formula_weight          327.47 
  
loop_ 
 _atom_type_symbol 
 _atom_type_description 
 _atom_type_scat_dispersion_real 
 _atom_type_scat_dispersion_imag 
 _atom_type_scat_source 
 'C'  'C'   0.0033   0.0016 
 'International Tables Vol C Tables 4.2.6.8 and 6.1.1.4' 
 'H'  'H'   0.0000   0.0000 
 'International Tables Vol C Tables 4.2.6.8 and 6.1.1.4' 
 'N'  'N'   0.0061   0.0033 
 'International Tables Vol C Tables 4.2.6.8 and 6.1.1.4' 
 'O'  'O'   0.0106   0.0060 
 'International Tables Vol C Tables 4.2.6.8 and 6.1.1.4' 
 'S'  'S'   0.1246   0.1234 
 'International Tables Vol C Tables 4.2.6.8 and 6.1.1.4' 
  
_symmetry_cell_setting            Triclinic 
_symmetry_space_group_name_H-M    P-1 
  
loop_ 
 _symmetry_equiv_pos_as_xyz 
 'x, y, z' 
 '-x, -y, -z' 
  
_cell_length_a                    8.7960(11) 
_cell_length_b                    9.6353(12) 
_cell_length_c                    9.7145(13) 
_cell_angle_alpha                 101.895(2) 
_cell_angle_beta                  93.023(2) 
_cell_angle_gamma                 107.367(2) 
_cell_volume                      763.14(17) 
_cell_formula_units_Z             2 
_cell_measurement_temperature     293(2) 
_cell_measurement_reflns_used     882 
_cell_measurement_theta_min       4.554 
_cell_measurement_theta_max       41.686 
  
_exptl_crystal_description        ? 
_exptl_crystal_colour             ? 
_exptl_crystal_size_max           ? 
_exptl_crystal_size_mid           ? 
_exptl_crystal_size_min           ? 
_exptl_crystal_density_meas       ? 
_exptl_crystal_density_diffrn     1.425 
_exptl_crystal_density_method     'not measured' 
_exptl_crystal_F_000              344 
_exptl_absorpt_coefficient_mu     0.485 
_exptl_absorpt_correction_type    sadabs 
_exptl_absorpt_correction_T_min   0.52381 
_exptl_absorpt_correction_T_max   1.00000 
_exptl_absorpt_process_details    ? 
  
_exptl_special_details 
; 
 ? 
; 
  
_diffrn_ambient_temperature       293(2) 
_diffrn_radiation_wavelength      0.71073 
_diffrn_radiation_type            MoK\a 
_diffrn_radiation_source          'fine-focus sealed tube' 
_diffrn_radiation_monochromator   graphite 
_diffrn_measurement_device_type   'CCD area detector' 
_diffrn_measurement_method        'phi and omega scans' 
_diffrn_detector_area_resol_mean  ? 
_diffrn_standards_number          ? 
_diffrn_standards_interval_count  ? 
_diffrn_standards_interval_time   ? 
_diffrn_standards_decay_%         ? 
_diffrn_reflns_number             4729 
_diffrn_reflns_av_R_equivalents   0.0547 
_diffrn_reflns_av_sigmaI/netI     0.1066 
_diffrn_reflns_limit_h_min        -11 
_diffrn_reflns_limit_h_max        10 
_diffrn_reflns_limit_k_min        -7 
_diffrn_reflns_limit_k_max        12 
_diffrn_reflns_limit_l_min        -12 
_diffrn_reflns_limit_l_max        12 
_diffrn_reflns_theta_min          2.16 
_diffrn_reflns_theta_max          28.26 
_reflns_number_total              3415 
_reflns_number_gt                 1713 
_reflns_threshold_expression      >2sigma(I) 
  
_computing_data_collection        'Bruker SMART' 
_computing_cell_refinement        'Bruker SMART' 
_computing_data_reduction         'Bruker SHELXTL' 
_computing_structure_solution     'SHELXS-97 (Sheldrick, 1990)' 
_computing_structure_refinement   'SHELXL-97 (Sheldrick, 1997)' 
_computing_molecular_graphics     'Bruker SHELXTL' 
_computing_publication_material   'Bruker SHELXTL' 
  
_refine_special_details 
; 
 Refinement of F^2^ against ALL reflections.  The weighted R-factor wR and 
 goodness of fit S are based on F^2^, conventional R-factors R are based 
 on F, with F set to zero for negative F^2^. The threshold expression of 
 F^2^ > 2sigma(F^2^) is used only for calculating R-factors(gt) etc. and is 
 not relevant to the choice of reflections for refinement.  R-factors based 
 on F^2^ are statistically about twice as large as those based on F, and R- 
 factors based on ALL data will be even larger. 
; 
  
_refine_ls_structure_factor_coef  Fsqd 
_refine_ls_matrix_type            full 
_refine_ls_weighting_scheme       calc 
_refine_ls_weighting_details 
 'calc w=1/[\s^2^(Fo^2^)+(0.0421P)^2^+0.0000P] where P=(Fo^2^+2Fc^2^)/3' 
_atom_sites_solution_primary      direct 
_atom_sites_solution_secondary    difmap 
_atom_sites_solution_hydrogens    geom 
_refine_ls_hydrogen_treatment     mixed 
_refine_ls_extinction_method      none 
_refine_ls_extinction_coef        ? 
_refine_ls_number_reflns          3415 
_refine_ls_number_parameters      249 
_refine_ls_number_restraints      0 
_refine_ls_R_factor_all           0.0917 
_refine_ls_R_factor_gt            0.0474 
_refine_ls_wR_factor_ref          0.1145 
_refine_ls_wR_factor_gt           0.1034 
_refine_ls_goodness_of_fit_ref    0.811 
_refine_ls_restrained_S_all       0.811 
_refine_ls_shift/su_max           0.073 
_refine_ls_shift/su_mean          0.017 
  
loop_ 
 _atom_site_label 
 _atom_site_type_symbol 
 _atom_site_fract_x 
 _atom_site_fract_y 
 _atom_site_fract_z 
 _atom_site_U_iso_or_equiv 
 _atom_site_adp_type 
 _atom_site_occupancy 
 _atom_site_symmetry_multiplicity 
 _atom_site_calc_flag 
 _atom_site_refinement_flags 
 _atom_site_disorder_assembly 
 _atom_site_disorder_group 
S1 S 0.17851(12) 0.39397(9) 1.06904(9) 0.0642(3) Uani 1 1 d . . . 
S2 S 0.10643(12) 0.35590(10) 0.76545(10) 0.0697(3) Uani 1 1 d . . . 
S3 S 0.37213(10) 0.69572(10) 0.81846(9) 0.0488(3) Uani 1 1 d . . . 
O1 O 0.3882(3) 0.5918(3) 0.6986(2) 0.0640(7) Uani 1 1 d . . . 
O2 O 0.5074(2) 0.8205(2) 0.8839(2) 0.0615(6) Uani 1 1 d . . . 
N N 0.3185(3) 0.6017(3) 0.9469(2) 0.0425(6) Uani 1 1 d . . . 
C1 C 0.2058(4) 0.4587(3) 0.9158(3) 0.0461(8) Uani 1 1 d . . . 
C2 C 0.3421(4) 0.6747(3) 1.1009(3) 0.0478(8) Uani 1 1 d . . . 
C3 C 0.4844(5) 0.8118(4) 1.1655(4) 0.0627(11) Uani 1 1 d . . . 
C4 C 0.4834(7) 0.8544(5) 1.3238(4) 0.0726(13) Uani 1 1 d . . . 
C5 C 0.4692(6) 0.7286(5) 1.3974(4) 0.0780(13) Uani 1 1 d . . . 
C6 C 0.3294(5) 0.5919(5) 1.3301(4) 0.0631(11) Uani 1 1 d . . . 
C7 C 0.3357(5) 0.5518(4) 1.1738(4) 0.0567(9) Uani 1 1 d . . . 
C8 C 0.2140(3) 0.7607(3) 0.7791(3) 0.0404(7) Uani 1 1 d . . . 
C9 C 0.2015(4) 0.8889(3) 0.8672(3) 0.0457(8) Uani 1 1 d . . . 
C10 C 0.0819(4) 0.9438(4) 0.8303(4) 0.0524(9) Uani 1 1 d . . . 
C11 C -0.0263(4) 0.8762(4) 0.7108(4) 0.0530(9) Uani 1 1 d . . . 
C12 C -0.0126(4) 0.7474(4) 0.6247(4) 0.0590(10) Uani 1 1 d . . . 
C13 C 0.1078(4) 0.6900(4) 0.6585(3) 0.0538(9) Uani 1 1 d . . . 
C14 C -0.1575(6) 0.9380(7) 0.6738(8) 0.0902(16) Uani 1 1 d . . . 
H1 H 0.234(4) 0.693(3) 1.121(3) 0.073(11) Uiso 1 1 d . . . 
H2 H 0.471(4) 0.892(4) 1.122(3) 0.071(11) Uiso 1 1 d . . . 
H3 H 0.574(4) 0.779(4) 1.139(3) 0.070(12) Uiso 1 1 d . . . 
H4 H 0.420(6) 0.917(6) 1.343(5) 0.17(3) Uiso 1 1 d . . . 
H5 H 0.567(4) 0.926(4) 1.362(3) 0.053(10) Uiso 1 1 d . . . 
H6 H 0.454(4) 0.756(3) 1.492(3) 0.059(10) Uiso 1 1 d . . . 
H7 H 0.586(8) 0.722(7) 1.395(6) 0.21(3) Uiso 1 1 d . . . 
H8 H 0.241(4) 0.616(3) 1.351(3) 0.059(11) Uiso 1 1 d . . . 
H9 H 0.331(4) 0.517(4) 1.367(4) 0.084(14) Uiso 1 1 d . . . 
H10 H 0.436(4) 0.531(4) 1.159(4) 0.094(14) Uiso 1 1 d . . . 
H11 H 0.276(3) 0.940(3) 0.952(3) 0.047(8) Uiso 1 1 d . . . 
H12 H 0.079(3) 1.027(3) 0.890(3) 0.047(9) Uiso 1 1 d . . . 
H13 H -0.091(4) 0.691(3) 0.539(3) 0.057(9) Uiso 1 1 d . . . 
H14 H 0.107(4) 0.594(4) 0.595(4) 0.086(12) Uiso 1 1 d . . . 
H15 H -0.258(6) 0.886(5) 0.713(4) 0.114(17) Uiso 1 1 d . . . 
H16 H -0.127(6) 1.037(6) 0.696(5) 0.14(2) Uiso 1 1 d . . . 
H17 H -0.189(7) 0.907(6) 0.578(6) 0.16(3) Uiso 1 1 d . . . 
  
loop_ 
 _atom_site_aniso_label 
 _atom_site_aniso_U_11 
 _atom_site_aniso_U_22 
 _atom_site_aniso_U_33 
 _atom_site_aniso_U_23 
 _atom_site_aniso_U_13 
 _atom_site_aniso_U_12 
S1 0.0818(7) 0.0478(5) 0.0526(6) 0.0187(4) 0.0075(5) 0.0006(5) 
S2 0.0862(8) 0.0585(6) 0.0525(6) 0.0032(5) -0.0049(5) 0.0145(5) 
S3 0.0507(5) 0.0586(6) 0.0471(5) 0.0253(4) 0.0147(4) 0.0217(4) 
O1 0.0846(18) 0.0772(16) 0.0520(14) 0.0254(13) 0.0299(13) 0.0470(14) 
O2 0.0403(13) 0.0708(16) 0.0747(17) 0.0405(13) 0.0065(12) 0.0037(12) 
N 0.0451(16) 0.0456(15) 0.0376(15) 0.0146(12) 0.0043(11) 0.0125(12) 
C1 0.048(2) 0.0434(19) 0.051(2) 0.0159(15) 0.0088(15) 0.0164(16) 
C2 0.051(2) 0.047(2) 0.043(2) 0.0133(15) 0.0049(16) 0.0111(17) 
C3 0.072(3) 0.052(2) 0.057(2) 0.0204(19) -0.002(2) 0.006(2) 
C4 0.094(3) 0.054(3) 0.052(3) -0.001(2) -0.011(2) 0.009(3) 
C5 0.094(4) 0.081(3) 0.040(2) 0.013(2) -0.004(2) 0.003(3) 
C6 0.076(3) 0.069(3) 0.046(2) 0.021(2) 0.015(2) 0.019(2) 
C7 0.067(3) 0.055(2) 0.046(2) 0.0193(17) 0.0035(18) 0.0101(19) 
C8 0.0448(19) 0.0434(18) 0.0348(17) 0.0160(14) 0.0075(14) 0.0116(14) 
C9 0.049(2) 0.0422(19) 0.0398(19) 0.0087(15) 0.0015(16) 0.0062(16) 
C10 0.055(2) 0.039(2) 0.063(2) 0.0093(18) 0.0095(19) 0.0145(17) 
C11 0.046(2) 0.049(2) 0.064(2) 0.0208(18) 0.0009(17) 0.0110(17) 
C12 0.065(2) 0.056(2) 0.046(2) 0.0094(18) -0.0121(19) 0.0095(19) 
C13 0.071(3) 0.050(2) 0.040(2) 0.0099(17) 0.0036(18) 0.0212(19) 
C14 0.060(3) 0.083(4) 0.135(5) 0.037(4) -0.010(3) 0.030(3) 
  
_geom_special_details 
; 
 All esds (except the esd in the dihedral angle between two l.s. planes) 
 are estimated using the full covariance matrix.  The cell esds are taken 
 into account individually in the estimation of esds in distances, angles 
 and torsion angles; correlations between esds in cell parameters are only 
 used when they are defined by crystal symmetry.  An approximate (isotropic) 
 treatment of cell esds is used for estimating esds involving l.s. planes. 
; 
  
loop_ 
 _geom_bond_atom_site_label_1 
 _geom_bond_atom_site_label_2 
 _geom_bond_distance 
 _geom_bond_site_symmetry_2 
 _geom_bond_publ_flag 
S1 C1 1.730(3) . ? 
S1 C7 1.794(4) . ? 
S2 C1 1.622(3) . ? 
S3 O1 1.414(2) . ? 
S3 O2 1.420(2) . ? 
S3 N 1.695(2) . ? 
S3 C8 1.743(3) . ? 
N C1 1.397(4) . ? 
N C2 1.490(4) . ? 
C2 C7 1.489(4) . ? 
C2 C3 1.514(5) . ? 
C2 H1 1.04(3) . ? 
C3 C4 1.509(5) . ? 
C3 H2 0.98(3) . ? 
C3 H3 0.96(3) . ? 
C4 C5 1.508(6) . ? 
C4 H4 0.93(5) . ? 
C4 H5 0.84(3) . ? 
C5 C6 1.506(6) . ? 
C5 H6 0.93(3) . ? 
C5 H7 1.05(6) . ? 
C6 C7 1.496(5) . ? 
C6 H8 0.90(3) . ? 
C6 H9 0.88(4) . ? 
C7 H10 0.97(3) . ? 
C8 C13 1.372(4) . ? 
C8 C9 1.387(4) . ? 
C9 C10 1.374(4) . ? 
C9 H11 0.97(3) . ? 
C10 C11 1.371(4) . ? 
C10 H12 0.90(3) . ? 
C11 C12 1.388(4) . ? 
C11 C14 1.506(5) . ? 
C12 C13 1.387(5) . ? 
C12 H13 1.00(3) . ? 
C13 H14 0.99(3) . ? 
C14 H15 1.01(4) . ? 
C14 H16 0.88(5) . ? 
C14 H17 0.91(5) . ? 
  
loop_ 
 _geom_angle_atom_site_label_1 
 _geom_angle_atom_site_label_2 
 _geom_angle_atom_site_label_3 
 _geom_angle 
 _geom_angle_site_symmetry_1 
 _geom_angle_site_symmetry_3 
 _geom_angle_publ_flag 
C1 S1 C7 93.12(15) . . ? 
O1 S3 O2 119.31(15) . . ? 
O1 S3 N 107.31(13) . . ? 
O2 S3 N 104.90(13) . . ? 
O1 S3 C8 109.72(14) . . ? 
O2 S3 C8 108.51(14) . . ? 
N S3 C8 106.26(13) . . ? 
C1 N C2 112.1(2) . . ? 
C1 N S3 121.3(2) . . ? 
C2 N S3 123.87(19) . . ? 
N C1 S2 129.9(2) . . ? 
N C1 S1 109.9(2) . . ? 
S2 C1 S1 120.25(18) . . ? 
C7 C2 N 104.6(3) . . ? 
C7 C2 C3 111.1(3) . . ? 
N C2 C3 121.5(3) . . ? 
C7 C2 H1 100.6(17) . . ? 
N C2 H1 105.0(18) . . ? 
C3 C2 H1 111.8(17) . . ? 
C4 C3 C2 109.8(3) . . ? 
C4 C3 H2 110.4(19) . . ? 
C2 C3 H2 105.9(19) . . ? 
C4 C3 H3 113(2) . . ? 
C2 C3 H3 103(2) . . ? 
H2 C3 H3 114(3) . . ? 
C5 C4 C3 114.7(4) . . ? 
C5 C4 H4 121(3) . . ? 
C3 C4 H4 109(3) . . ? 
C5 C4 H5 109(2) . . ? 
C3 C4 H5 110(2) . . ? 
H4 C4 H5 91(4) . . ? 
C6 C5 C4 112.3(4) . . ? 
C6 C5 H6 107(2) . . ? 
C4 C5 H6 111.3(19) . . ? 
C6 C5 H7 119(3) . . ? 
C4 C5 H7 100(3) . . ? 
H6 C5 H7 108(4) . . ? 
C7 C6 C5 109.5(3) . . ? 
C7 C6 H8 112(2) . . ? 
C5 C6 H8 106(2) . . ? 
C7 C6 H9 110(2) . . ? 
C5 C6 H9 110(2) . . ? 
H8 C6 H9 109(3) . . ? 
C2 C7 C6 114.7(3) . . ? 
C2 C7 S1 104.4(2) . . ? 
C6 C7 S1 117.9(3) . . ? 
C2 C7 H10 104(2) . . ? 
C6 C7 H10 108(2) . . ? 
S1 C7 H10 106(2) . . ? 
C13 C8 C9 120.5(3) . . ? 
C13 C8 S3 120.2(3) . . ? 
C9 C8 S3 119.2(2) . . ? 
C10 C9 C8 118.6(3) . . ? 
C10 C9 H11 120.1(16) . . ? 
C8 C9 H11 121.3(16) . . ? 
C11 C10 C9 122.6(3) . . ? 
C11 C10 H12 122.3(19) . . ? 
C9 C10 H12 115.2(19) . . ? 
C10 C11 C12 117.9(3) . . ? 
C10 C11 C14 121.4(4) . . ? 
C12 C11 C14 120.6(4) . . ? 
C13 C12 C11 120.8(3) . . ? 
C13 C12 H13 117.8(16) . . ? 
C11 C12 H13 121.4(16) . . ? 
C8 C13 C12 119.6(3) . . ? 
C8 C13 H14 123(2) . . ? 
C12 C13 H14 117(2) . . ? 
C11 C14 H15 109(2) . . ? 
C11 C14 H16 113(3) . . ? 
H15 C14 H16 115(4) . . ? 
C11 C14 H17 109(4) . . ? 
H15 C14 H17 102(4) . . ? 
H16 C14 H17 108(5) . . ? 
  
loop_ 
 _geom_torsion_atom_site_label_1 
 _geom_torsion_atom_site_label_2 
 _geom_torsion_atom_site_label_3 
 _geom_torsion_atom_site_label_4 
 _geom_torsion 
 _geom_torsion_site_symmetry_1 
 _geom_torsion_site_symmetry_2 
 _geom_torsion_site_symmetry_3 
 _geom_torsion_site_symmetry_4 
 _geom_torsion_publ_flag 
O1 S3 N C1 -41.5(3) . . . . ? 
O2 S3 N C1 -169.3(2) . . . . ? 
C8 S3 N C1 75.8(2) . . . . ? 
O1 S3 N C2 158.6(2) . . . . ? 
O2 S3 N C2 30.8(3) . . . . ? 
C8 S3 N C2 -84.0(3) . . . . ? 
C2 N C1 S2 161.8(2) . . . . ? 
S3 N C1 S2 -0.2(4) . . . . ? 
C2 N C1 S1 -18.2(3) . . . . ? 
S3 N C1 S1 179.80(14) . . . . ? 
C7 S1 C1 N -5.8(2) . . . . ? 
C7 S1 C1 S2 174.2(2) . . . . ? 
C1 N C2 C7 38.5(3) . . . . ? 
S3 N C2 C7 -160.0(2) . . . . ? 
C1 N C2 C3 165.0(3) . . . . ? 
S3 N C2 C3 -33.5(4) . . . . ? 
C7 C2 C3 C4 -52.5(5) . . . . ? 
N C2 C3 C4 -176.0(3) . . . . ? 
C2 C3 C4 C5 51.7(6) . . . . ? 
C3 C4 C5 C6 -52.0(6) . . . . ? 
C4 C5 C6 C7 51.0(6) . . . . ? 
N C2 C7 C6 -170.3(3) . . . . ? 
C3 C2 C7 C6 56.9(5) . . . . ? 
N C2 C7 S1 -39.8(3) . . . . ? 
C3 C2 C7 S1 -172.5(3) . . . . ? 
C5 C6 C7 C2 -55.2(5) . . . . ? 
C5 C6 C7 S1 -178.8(3) . . . . ? 
C1 S1 C7 C2 27.3(3) . . . . ? 
C1 S1 C7 C6 155.9(3) . . . . ? 
O1 S3 C8 C13 12.7(3) . . . . ? 
O2 S3 C8 C13 144.6(3) . . . . ? 
N S3 C8 C13 -103.0(3) . . . . ? 
O1 S3 C8 C9 -164.1(2) . . . . ? 
O2 S3 C8 C9 -32.2(3) . . . . ? 
N S3 C8 C9 80.2(3) . . . . ? 
C13 C8 C9 C10 -0.6(5) . . . . ? 
S3 C8 C9 C10 176.2(2) . . . . ? 
C8 C9 C10 C11 0.7(5) . . . . ? 
C9 C10 C11 C12 -0.2(5) . . . . ? 
C9 C10 C11 C14 179.3(4) . . . . ? 
C10 C11 C12 C13 -0.4(5) . . . . ? 
C14 C11 C12 C13 -179.9(4) . . . . ? 
C9 C8 C13 C12 0.1(5) . . . . ? 
S3 C8 C13 C12 -176.7(3) . . . . ? 
C11 C12 C13 C8 0.4(5) . . . . ? 
  
_diffrn_measured_fraction_theta_max    0.906 
_diffrn_reflns_theta_full              28.26 
_diffrn_measured_fraction_theta_full   0.906 
_refine_diff_density_max    0.244 
_refine_diff_density_min   -0.225 
_refine_diff_density_rms    0.054 
  
